# Supplementary material for: C-FGF23 peptide alleviates hypoferremia during acute inflammation
Source: PubMed Central journal article supplement — Haematologica. 2020 Mar 9;106(2):391–403. doi: 10.3324/haematol.2019.237040 (PMC7849576; doi:10.3324/haematol.2019.237040), 2020-03-09
Supplement: 2019_237040-Disclosures_Contributions.pdf [file 2019_237040-Disclosures_Contributions.pdf]

Haematologica  
HAEMATOL/2019/237040  
Version 3

C-FGF23 peptide alleviates hypoferrremia during acute inflammation

Rafiou Agoro, Min Young Park, Carole Le Henaff, Stanislovas Jankauskas, Alina Gaias, Gaozhi Chen, Moosa Mohammadi, and Despina Sitara

Disclosures: Financial Support This work was supported by funds from the US Department of Defense (W81XWH-16-1-0598) to Despina Sitara, and the NIH (NIDCR) to Moosa Mohammadi (DE 13686).

Contributions: RA developed and directed the project, performed research and data analysis, and wrote the manuscript. MYP and CLH performed research, data and statistical analyses. SJ and AG performed research. GC purified and crystallized the C-tail FGF23 and analyzed its crystal structure. MM designed, refined, analyzed, and interpreted the crystal structure of the C-tail FGF23. DS developed and directed the project, performed data analysis, supervised the study, and wrote the manuscript.
