# Supplementary material for: C-FGF23 peptide alleviates hypoferremia during acute inflammation
Source: PubMed Central journal article supplement — Haematologica. 2020 Mar 9;106(2):391–403. doi: 10.3324/haematol.2019.237040 (PMC7849576; doi:10.3324/haematol.2019.237040), 2020-03-09
Supplement: 2019_237040_AGORO_SUPPL.pdf [file 2019_237040_AGORO_SUPPL.pdf]

## C-FGF23 peptide alleviates hypoferremia during acute inflammation

Rafiou Agoro,<sup>1</sup> Min Young Park,<sup>1</sup> Carole Le Henaff,<sup>1</sup> Stanislovas Jankauskas,<sup>1</sup> Alina Gaias,<sup>1</sup> Gaozhi Chen,<sup>2</sup> Moosa Mohammadi<sup>3</sup> and Despina Sitara<sup>1,4</sup>

<sup>1</sup>Department of Basic Science and Craniofacial Biology, NYU College of Dentistry, New York, NY, USA; <sup>2</sup>Chemical Biology Research Center, School of Pharmaceutical Sciences, Wenzhou Medical University, Wenzhou, China; <sup>3</sup>Departments of Biochemistry and Molecular Pharmacology, NYU School of Medicine, New York, NY, USA and <sup>4</sup>Department of Medicine, NYU School of Medicine, New York, NY, USA

©2021 Ferrata Storti Foundation. This is an open-access paper. doi:10.3324/haematol.2019.237040

Received: September 2, 2019.

Accepted: March 13, 2020.

Pre-published: March 19, 2020.

Correspondence: *DESPINA SITARA* - ds199@nyu.edu

---

## **C-FGF23 peptide alleviates hypoferremia during acute inflammation**

Rafiou Agoro<sup>1</sup>, Min Young Park<sup>1</sup>, Carole Le Henaff<sup>1</sup>, Stanislovas Jankauskas<sup>1</sup>, Alina Gaias<sup>1</sup>, Gaozhi Chen<sup>2</sup>, Moosa Mohammadi<sup>3</sup>, Despina Sitara<sup>1, 4, \*</sup>

## **Supplemental data**

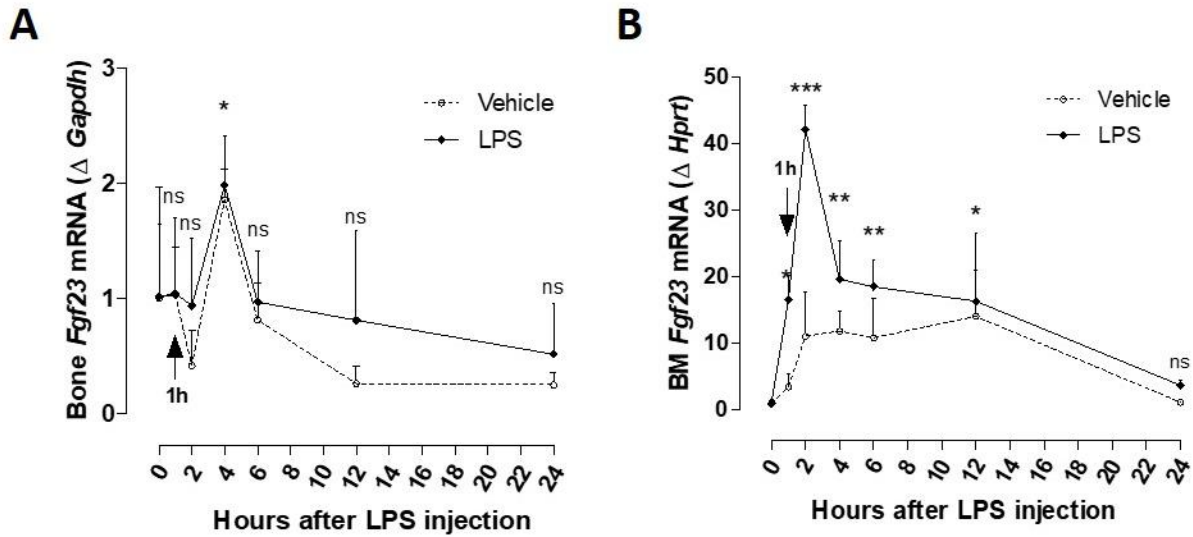

**Suppl. Figure S1. Effect of LPS on *Fgf23* expression in bone and bone marrow.**

C57BL/6J mice were injected i.p. with a single dose of saline (0.9% NaCl, indicated as Vehicle) or LPS (50  $\mu$ g/kg). Samples were collected at 0, 1, 2, 4, 6, 12, and 24 hours after injection and total mRNA was isolated. Quantitative real-time RT-PCR for *Fgf23* expression in **(A)** bone, and **(B)** bone marrow (BM). Data are expressed as fold change ( $2^{-\Delta\Delta C_t}$ ) relative to housekeeping genes *Gapdh* or *Hprt*. Samples were measured in duplicates (vehicle, n=3-4; LPS, n=5-8). Data are represented as mean  $\pm$  SD. All data were analyzed for normality by Shapiro-Wilk test and equivalence of variance using Levene's test. As the samples were not in normal distribution, data were analyzed with non-parametric Kruskal-Wallis test in each vehicle- or LPS-treated group compared to 0 h. ns: not significant compared to 0 h. \* $P < 0.05$ , \*\* $P < 0.01$ , \*\*\* $P < 0.001$  compared to 0 h.

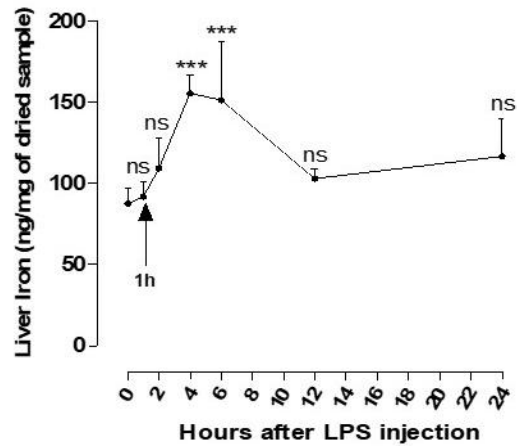

**Suppl. Figure S2. Effect of LPS on liver iron content.**

C57BL/6J mice were injected i.p. with a single dose of LPS (50 µg/kg). Samples were collected at 0, 1, 2, 4, 6, 12, and 24 hours after injection. Samples were measured in duplicates (n=3). Data are represented as mean  $\pm$  SD. All data were analyzed for normality by Shapiro-Wilk test and equivalence of variance using Levene's test, followed by one-way ANOVA with Bonferroni's multiple comparison test. ns: not significant compared to 0 h, \*\*\* $P < 0.001$  compared to 0 h.

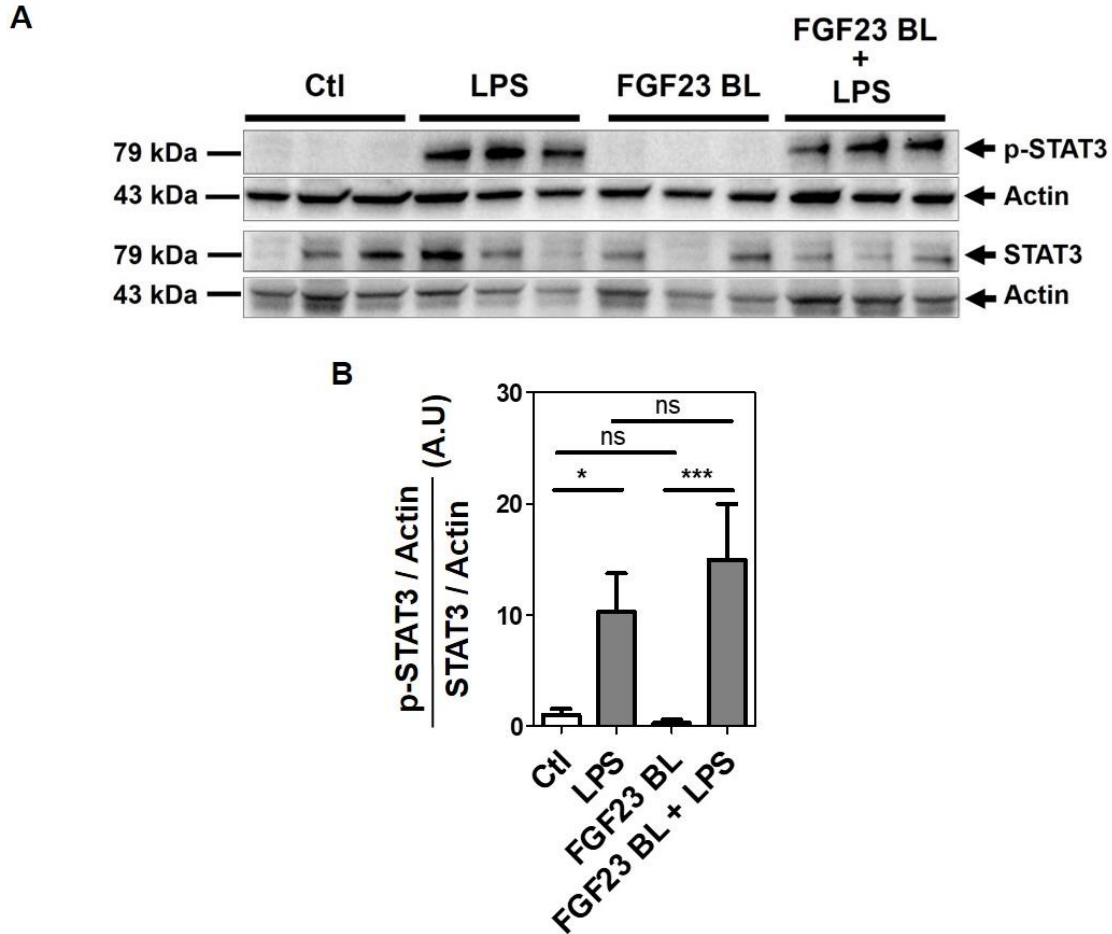

**Suppl. Figure S3. Effect of inhibition of FGF23 signaling on STAT3 signaling in LPS-challenged mice.**

C57BL/6J wild type mice were treated with C-tail FGF23 (1 mg/kg, indicated as FGF23 BL) or vehicle (HEPES buffer) for 8 hours. Mice were then challenged with LPS (i.p 50 µg/kg) or vehicle (0.9% NaCl) for 4 h. **(A)** Representative western blot image, and **(B)** ratio of phospho-STAT3 to STAT3 for 3 mice per each group. Data are expressed as ratio of STAT3 or phospho-STAT3 signal intensity to housekeeping protein (Actin) signal intensity in arbitrary units (A.U.). Data are represented as mean  $\pm$  SD. All data were analyzed for normality by Shapiro-Wilk test and equivalence of variance using Levene's test. Because data were not showing normal distribution, same tests were proceeded after data were aligned in rank transformation. Then two-way ANOVA was performed with Bonferroni's multiple comparison test. Ctl: control (vehicle), ns: not significant, \* $P < 0.05$ , \*\*\* $P < 0.001$ .

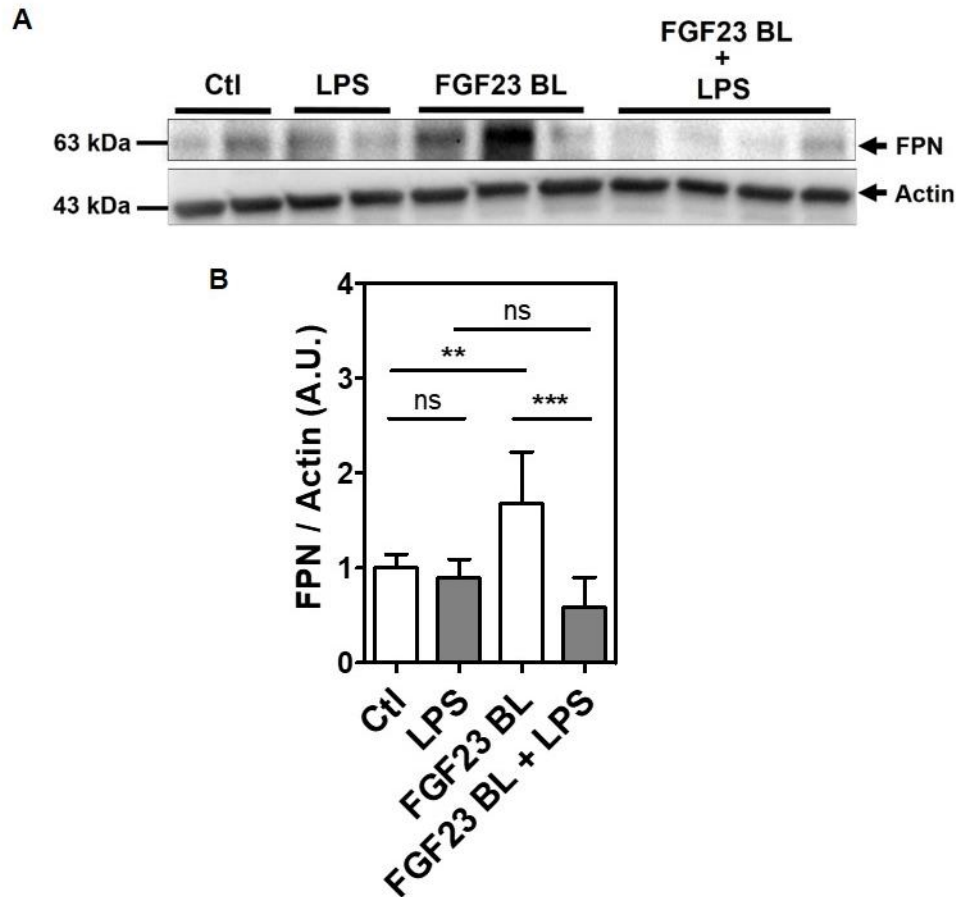

**Suppl. Figure S4. Inhibition of FGF23 signaling increases spleen Ferropotrin (FPN) protein levels.**

C57BL/6J wild type mice were treated with C-tail FGF23 (1 mg/kg, indicated as FGF23 BL) or vehicle (HEPES buffer) for 8 hours. Mice were then challenged with LPS (i.p 50 µg/kg) or vehicle (0.9% NaCl) for 4 h. **(A)** Representative western blot, and **(B)** calculated FPN abundance for two western blots comprising 3-5 mice per group. Data are expressed as ratio of FPN signal intensity to housekeeping protein (Actin) signal intensity in arbitrary units (A.U.). Data are represented as mean +/- SD. All data were analyzed for normality by Shapiro-Wilk test and equivalence of variance using Levene's test, followed by two-way ANOVA which was performed with Bonferroni's multiple comparison test. Ctl: control (vehicle) ns: not significant, \*\* $P < 0.01$ , \*\*\* $P < 0.001$ .

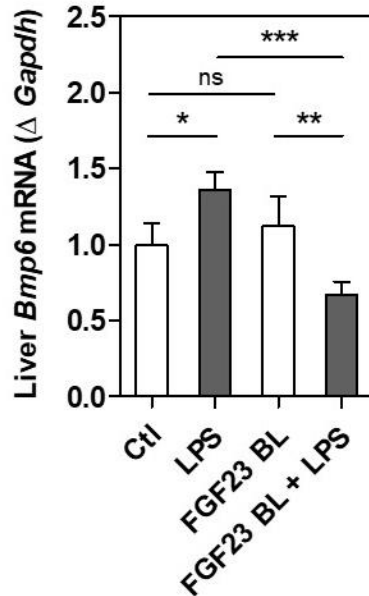

**Suppl. Figure S5. Effect of FGF23 signaling inhibition on hepatic *Bmp6* mRNA expression**

C57BL/6J wild type mice were treated with C-tail FGF23 (1 mg/kg, indicated as FGF23 BL) or vehicle (HEPES buffer) for 8 hours. Mice were then challenged with LPS (i.p 50  $\mu$ g/kg) or vehicle (0.9% NaCl) for 4 h. Quantitative real-time RT-PCR for hepatic expression of *Bmp6*. Data are expressed as fold change ( $2^{-\Delta\Delta C_t}$ ) relative to housekeeping gene *Gapdh*. Samples were measured in duplicates (n=5-7 per group). Data are represented as mean  $\pm$  SD. All data were analyzed for normality by Shapiro-Wilk test and equivalence of variance using Levene's test, followed by two-way ANOVA with Bonferroni's multiple comparison test. Ctl: control (vehicle) ns: not significant, \* $P < 0.05$ , \*\* $P < 0.01$ , \*\*\* $P < 0.001$ .

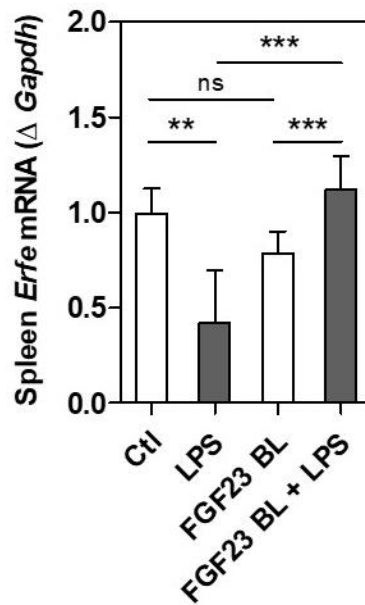

**Suppl. Figure S6. Effect of FGF23 signaling inhibition on splenic *Erfe* mRNA expression**

C57BL/6J wild type mice were treated with C-tail FGF23 (1 mg/kg, indicated as FGF23 BL) or vehicle (HEPES buffer) for 8 hours. Mice were then challenged with LPS (i.p 50  $\mu$ g/kg) or vehicle (0.9% NaCl) for 4 h. **(A-C)** Quantitative real-time RT-PCR for splenic expression of *Erfe*. Data are expressed as fold change ( $2^{-\Delta\Delta C_t}$ ) relative to housekeeping gene *Gapdh*. Samples were measured in duplicates (n=5-7 per group). Data are represented as mean  $\pm$  SD. All data were analyzed for normality by Shapiro-Wilk test and equivalence of variance using Levene's test. As the samples were not in normal distribution, data were analyzed with non-parametric Kruskal-Wallis test. Ctl: control (vehicle), ns: not significant, \*\* $P < 0.01$ , \*\*\* $P < 0.001$ .

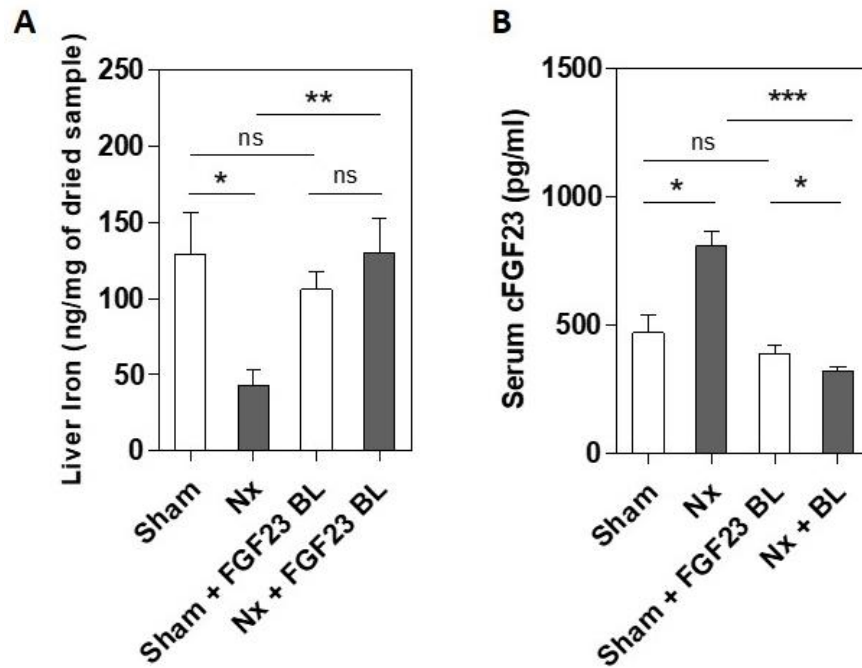

**Suppl. Figure S7. Effect of FGF23 signaling inhibition on liver iron content and serum FGF23 in a mouse model of chronic kidney disease.**

Control (Sham) and 5/6 nephrectomy (Nx) mice of 18 weeks of age were injected i.p. with the C-tail FGF23 (10 mg/kg, indicated as FGF23 BL) or vehicle (HEPES buffer) and evaluated 12 hours post-injection. **(A)** Liver iron content was measured using the Ferrozine assay, and **(B)** C-terminal FGF23 (cFGF23) was measured by ELISA. Samples were measured in duplicates.  $n = 6$  mice per group. Data are presented as mean  $\pm$  SD. All data were analyzed for normality by Shapiro-Wilk test and equivalence of variance using Levene's test. As the samples showed normal distribution, two-way ANOVA was performed with Bonferroni's multiple comparison test (A). For data not showing normal distribution, same tests were proceeded after data were aligned in rank transformation. Then two-way ANOVA was performed in each vehicle- or LPS-treated group with Bonferroni's multiple comparison test (B). ns: not significant,  $*P < 0.05$ ,  $**P < 0.01$ ,  $***P < 0.001$ .

**Supplementary Table 1**

| <b>Gene</b>                    | <b>Primer</b>  | <b>Sequence (5' - 3')</b>       |
|--------------------------------|----------------|---------------------------------|
| <i>IL-6</i>                    | Forward primer | ATC CAG TTG CCT TCT TGG GAC TGA |
|                                | Reverse primer | TAA GCC TCC GAC TTG TGA AGT GGT |
| <i>TNF-<math>\alpha</math></i> | Forward primer | AAG GGA GAG TGG TCA GGT TGC C   |
|                                | Reverse primer | CCT CAG GGA AGA GTC TGG AAA GG  |
| <i>IL-1<math>\beta</math></i>  | Forward primer | CAG GAT GAG GAC ATG AGC ACC     |
|                                | Reverse primer | CTC TGC AGA CTC AAA CTC CAC     |
| <i>Fgf23</i>                   | Forward primer | ACT TGG CCT TTA TTA GCC GGG TCT |
|                                | Reverse primer | AGA TGG CCT CTT CCC TGT GTT CAA |
| <i>Klotho</i>                  | Forward primer | AAA TGG CTG GTT TGT CTC GGG AAC |
|                                | Reverse primer | TAT GCC ACT CGA AAC CGT CCA TGA |
| <i>Hepcidin (Hamp)</i>         | Forward primer | CAC CAC CTA TCT CCA TCA ACA G   |
|                                | Reverse primer | GTT GGT GTC TCT CTT CCT TCT C   |
| <i>Bmp6</i>                    | Forward primer | GTG TGG GCC TCC GAA GAA         |
|                                | Reverse primer | ACA CTC AGC TGG AGT CCC ATG T   |
| <i>Lcn2</i>                    | Forward primer | CCA GTT CGC CAT GGT ATT TT      |
|                                | Reverse primer | AGT CTT GGC GTA AGG GTT CA      |
| <i>Epo</i>                     | Forward primer | TCT ACG TAG CCT CAC TTC ACT     |
|                                | Reverse primer | ACC CGG AAG AGC TTG CAG AAA     |
| <i>EpoR</i>                    | Forward primer | GGG CTG CAT GGA CAA ACT         |
|                                | Reverse primer | GCC GCT TTG CTC TCA AAC TT      |
| <i>NaPi2a</i>                  | Forward primer | GTG CCT CTG ATG CTG GCT TTC     |
|                                | Reverse primer | CTG GAA CTC TGC ACC AGA ACT     |
| <i>NaPi2c</i>                  | Forward primer | CTC ACC ATA CAT GCA GAG CTA GGA |
|                                | Reverse primer | TGC ATT TCT CAG ACT CCG GT      |
| <i>Hif2<math>\alpha</math></i> | Forward primer | GGG AAC ACT ACA CCC AGT GC      |
|                                | Reverse primer | TCT TCA AGG GAT TCT CCA AGG     |
| <i>FtH</i>                     | Forward primer | AAG TGC GCC AGA ACT ACC AC      |
|                                | Reverse primer | CAG AGC CAC ATC ATC TCG GT      |
| <i>Fpn</i>                     | Forward primer | CTC TGT CAG CCT GCT GTT TG      |
|                                | Reverse primer | TCA GGA TTT GGG GCC AAG ATG     |
| <i>Hprt</i>                    | Forward primer | AAG CCT AAG ATG AGC GCA AG      |
|                                | Reverse primer | TTA CTA GGC AGA TGG CCA CA      |
| <i>Gadph</i>                   | Forward primer | GAC TGT GGA TGG CCC CTC TG      |
|                                | Reverse primer | CGC CTG CTT CAC CAC CTC CT      |
